# Supplementary material for: Efficient separation of monobromotoluene isomers by nonporous adaptive perbromoethylated pillar[5]arene crystals
Source: Royal Society of Chemistry journal article supplement (doi:10.1039/d3cc03676f), 2023-01-01
Supplement: d3cc03676f1.pdf [file d3cc03676f1.pdf]

# Efficient Separation of Monobromotoluene Isomers by Nonporous Adaptive Perbromoethylated Pillar[5]arene Crystals

Bohan Zhao,<sup>#a</sup> Jianwei Wang,<sup>#a,b</sup> Li Shao,<sup>d</sup> Yitao Wu,<sup>a</sup> Ming Li,<sup>\*a</sup> Bin Hua<sup>\*a,b</sup> and Feihe  
Huang<sup>\*a,b,c</sup>

<sup>a</sup> Stoddart Institute of Molecular Science, Department of Chemistry, Zhejiang University,  
Hangzhou 310058, P. R. China; Fax and Tel: +86-571-8795-3189. Email addresses:  
mingzhelee@zju.edu.cn; huabin@zju.edu.cn; fhuang@zju.edu.cn

<sup>b</sup> Zhejiang-Israel Joint Laboratory of Self-Assembling Functional Materials, ZJU-Hangzhou  
Global Scientific and Technological Innovation Center, Zhejiang University, Hangzhou  
311215, P. R. China

<sup>c</sup> Green Catalysis Center and College of Chemistry, Zhengzhou University, Zhengzhou  
450001, P. R. China

<sup>d</sup> Department of Materials Science and Engineering, Zhejiang Sci-Tech University, Hangzhou  
310018, P. R. China

## Electronic Supplementary Information (33 pages)

|                                                            |     |
|------------------------------------------------------------|-----|
| 1. Materials .....                                         | S2  |
| 2. Methods .....                                           | S3  |
| 3. Crystallographic Data .....                             | S5  |
| 4. Characterization of Activated Pillararene Crystals..... | S7  |
| 5. Vapor-Phase Adsorption Measurements .....               | S12 |
| 6. Recyclability Test .....                                | S29 |
| 7. References .....                                        | S33 |

## 1. Materials

All the starting materials including *o*-bromotoluene (**OBT**) and *m*-bromotoluene (**MBT**) were purchased and used as received. Perbromoethylated pillararenes (**BrP5** and **BrP6**) were synthesized as described previously.<sup>S1,S2</sup> Activated **BrP5** and **BrP6** were prepared according to reported procedures.<sup>S3</sup>

**Table S1.** Physical properties of **OBT** and **MBT**.

| Compound   | Melting Point (K) | Boiling Point (K) | Saturated Vapor Pressure at 298 K (mm Hg) |
|------------|-------------------|-------------------|-------------------------------------------|
| <b>OBT</b> | 246.15            | 453.95            | 1.2 ± 0.3                                 |
| <b>MBT</b> | 233.15            | 455.25            | 1.1 ± 0.3                                 |
| <b>PBT</b> | 301.65            | 456.95            | 1.0 ± 0.3                                 |

## 2. Methods

### 2.1. Powder X-Ray Diffraction

X-ray powder diffraction data were measured on a SmartLab diffractometer with fixed divergence slits and a D/tex Ultra 250 detector at room temperature. The diffractometer was configured in parafocusing Bragg-Brentano geometry. Data was collected over a 2-theta range of 5° to 45° with a step size of 0.02° and a scan rate of 5°/min using a Cu  $K_{\alpha}$  radiation at a powder of 40 kV and 180 mA. Cu  $K_{\beta}$  radiation was removed using a divergent beam Ni filter.

### 2.2. Thermogravimetric Analysis

TGA was carried out using a Q5000IR analyzer (TA Instruments) with an automated vertical overhead thermobalance. The samples were heated at 10 °C/min using N<sub>2</sub> as the protective gas.

### 2.3. Single Crystal Growth

Single crystals of guest-loaded **BrP6** were grown by volatilization: A quantity of 5.00 mg of **BrP6** powder in its dried form was carefully dispensed into a small vial where 1.00 mL of the guest was added and the vial was heated until all the powder was dissolved. Colorless crystals were got by volatilization for 2-15 days.

### 2.4. Single Crystal X-ray Diffraction

Single crystal X-ray diffraction data were collected on a Bruker D8 VENTURE CMOS X-ray diffractometer with graphite monochromatic Mo- $K_{\alpha}$  radiation ( $\lambda = 0.71073 \text{ \AA}$ ).

### 2.5. Solution <sup>1</sup>H NMR Spectroscopy

<sup>1</sup>H NMR spectra were recorded by using a Bruker Avance DMX 600 spectrometer.

### 2.6. Gas Chromatography

Gas chromatographic analysis: GC measurements were carried out using an Agilent 7890B instrument configured with an FID detector and a HP-chiral $\beta$  column (30 m  $\times$  0.32 mm  $\times$  0.25  $\mu$ m). Samples were analyzed using headspace injections and were performed by incubating the sample at 85 °C for 30 min followed by sampling 1.00 mL of the headspace. The total volume of the container is 10 mL; the mass of the solid in the container is about 10 mg; the total volume of the headspace is 1 mL.

### 3. Crystallographic Data

**Table S2.** Experimental single crystal X-ray data for **(OBT)<sub>2</sub>@BrP6**.

|                                                 |                                                                        |
|-------------------------------------------------|------------------------------------------------------------------------|
| Collection Temperature [K]                      | 170.00                                                                 |
| Formula                                         | C <sub>80</sub> H <sub>86</sub> Br <sub>14</sub> O <sub>12</sub>       |
| Crystal System                                  | monoclinic                                                             |
| Space Group                                     | <i>P2<sub>1</sub>/c</i>                                                |
| <i>a</i> [Å]                                    | 25.7704(16)                                                            |
| <i>b</i> [Å]                                    | 13.7621(10)                                                            |
| <i>c</i> [Å]                                    | 23.8060(17)                                                            |
| $\alpha$ [°]                                    | 90                                                                     |
| $\beta$ [°]                                     | 90.1300(5)                                                             |
| $\gamma$ [°]                                    | 90                                                                     |
| Volume [Å <sup>3</sup> ]                        | 8442.9(10)                                                             |
| <i>Z</i>                                        | 4                                                                      |
| <i>D</i> <sub>calcd</sub> [g cm <sup>-3</sup> ] | 1.855                                                                  |
| $\mu$ [mm <sup>-1</sup> ]                       | 6.697                                                                  |
| F(000)                                          | 4608.0                                                                 |
| Crystal size [mm <sup>3</sup> ]                 | 0.23 × 0.13 × 0.06                                                     |
| Radiation                                       | MoK $\alpha$ ( $\lambda = 0.71073$ )                                   |
| $2\theta$ range [°]                             | 3.77 to 55.123                                                         |
| Index ranges                                    | $-33 \leq h \leq 33,$<br>$-17 \leq k \leq 17,$<br>$-30 \leq l \leq 30$ |
| Reflections collected                           | 128129                                                                 |
| Independent reflections                         | 19153<br>[ $R_{int} = 0.1427,$<br>$R_{sigma} = 0.1004$ ]               |
| Data/restraints/parameters                      | 19153/1066/1152                                                        |

|                                                   |                                    |
|---------------------------------------------------|------------------------------------|
| Goodness-of-fit on $F^2$                          | 1.035                              |
| Final $R$ indexes [ $I > 2\sigma(I)$ ]            | $R_1 = 0.1014,$<br>$wR_2 = 0.2582$ |
| Final $R$ indexes [all data]                      | $R_1 = 0.1579,$<br>$wR_2 = 0.2943$ |
| Largest diff.<br>peak/hole / $e \text{ \AA}^{-3}$ | 3.01/-1.52                         |
| CCDC                                              | 2261922                            |

#### 4. Characterization of Activated Pillararene Crystals

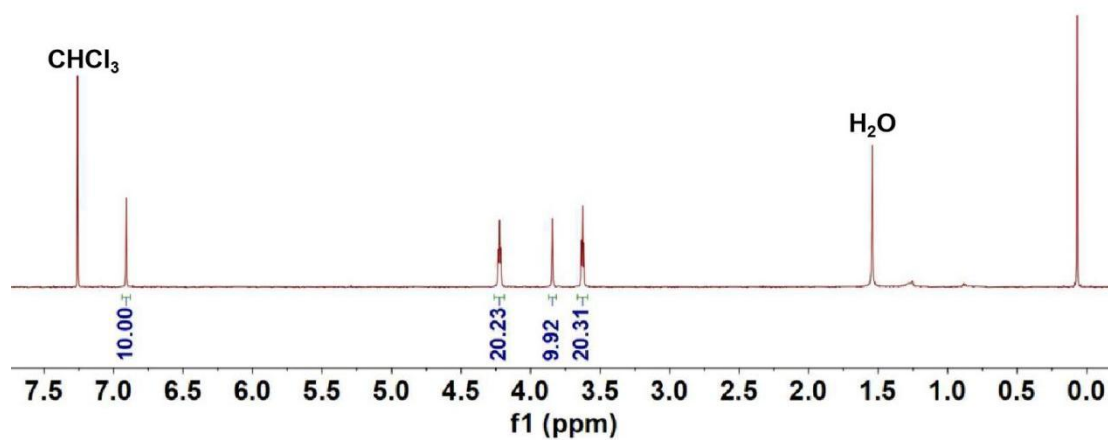

**Fig. S1** <sup>1</sup>H NMR spectrum (600 MHz, chloroform-*d*, 298 K) of activated **BrP5** crystals.

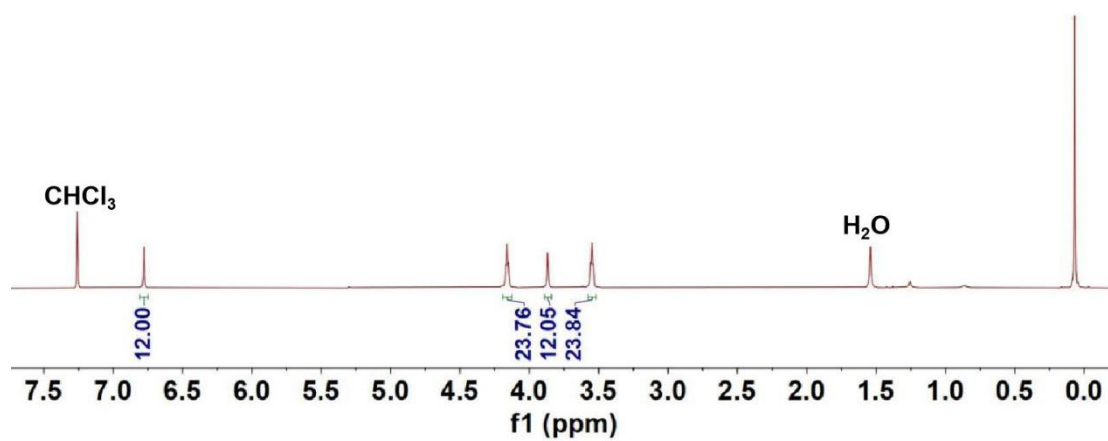

**Fig. S2** <sup>1</sup>H NMR spectrum (600 MHz, chloroform-*d*, 298 K) of activated **BrP6** crystals.

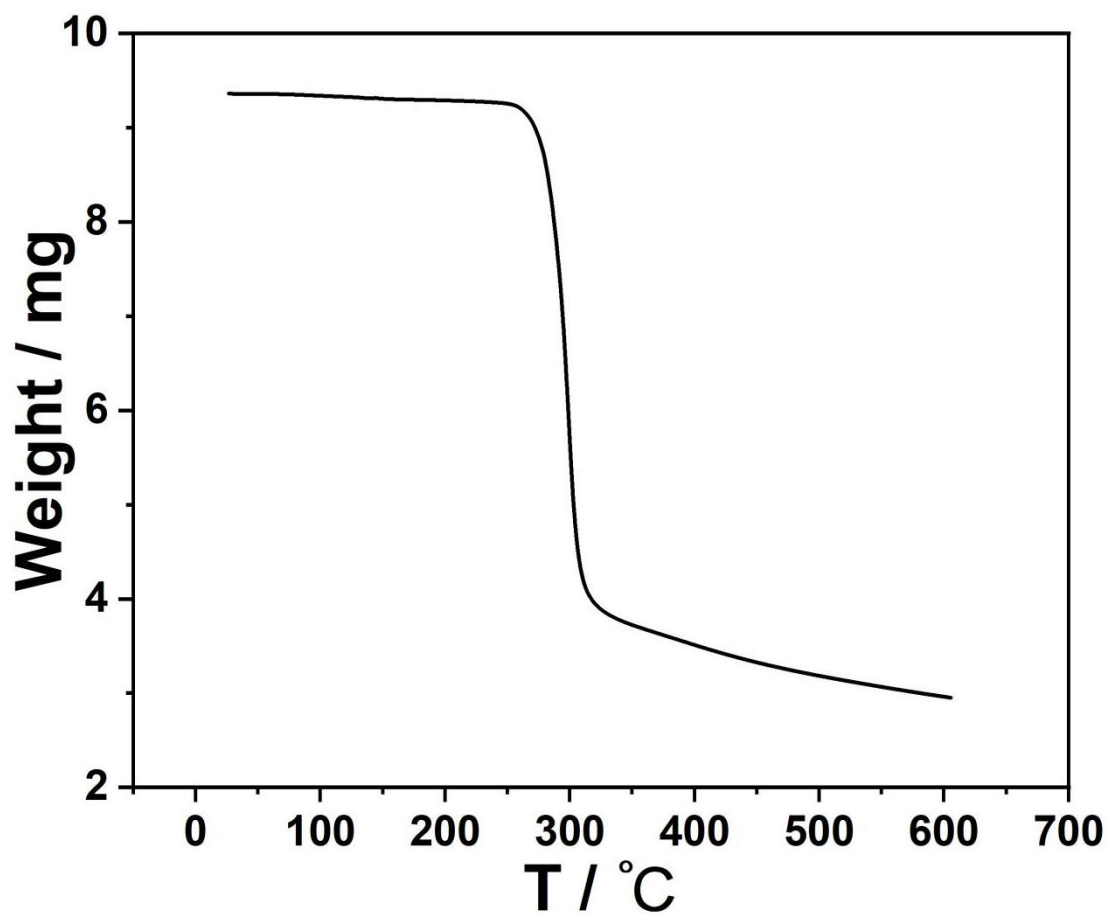

Fig. S3 Thermogravimetric analysis of activated **BrP5** crystals.



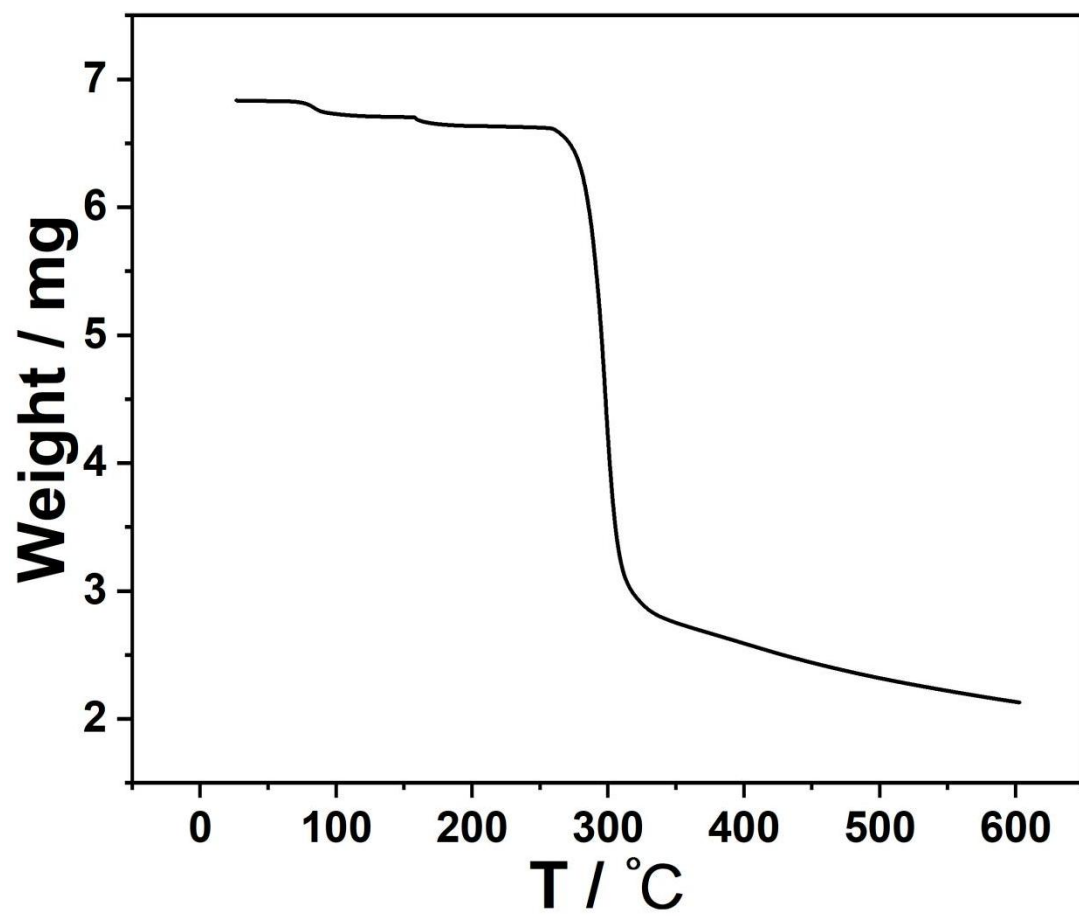

**Fig. S4** Thermogravimetric analysis of activated **BrP6** crystals.

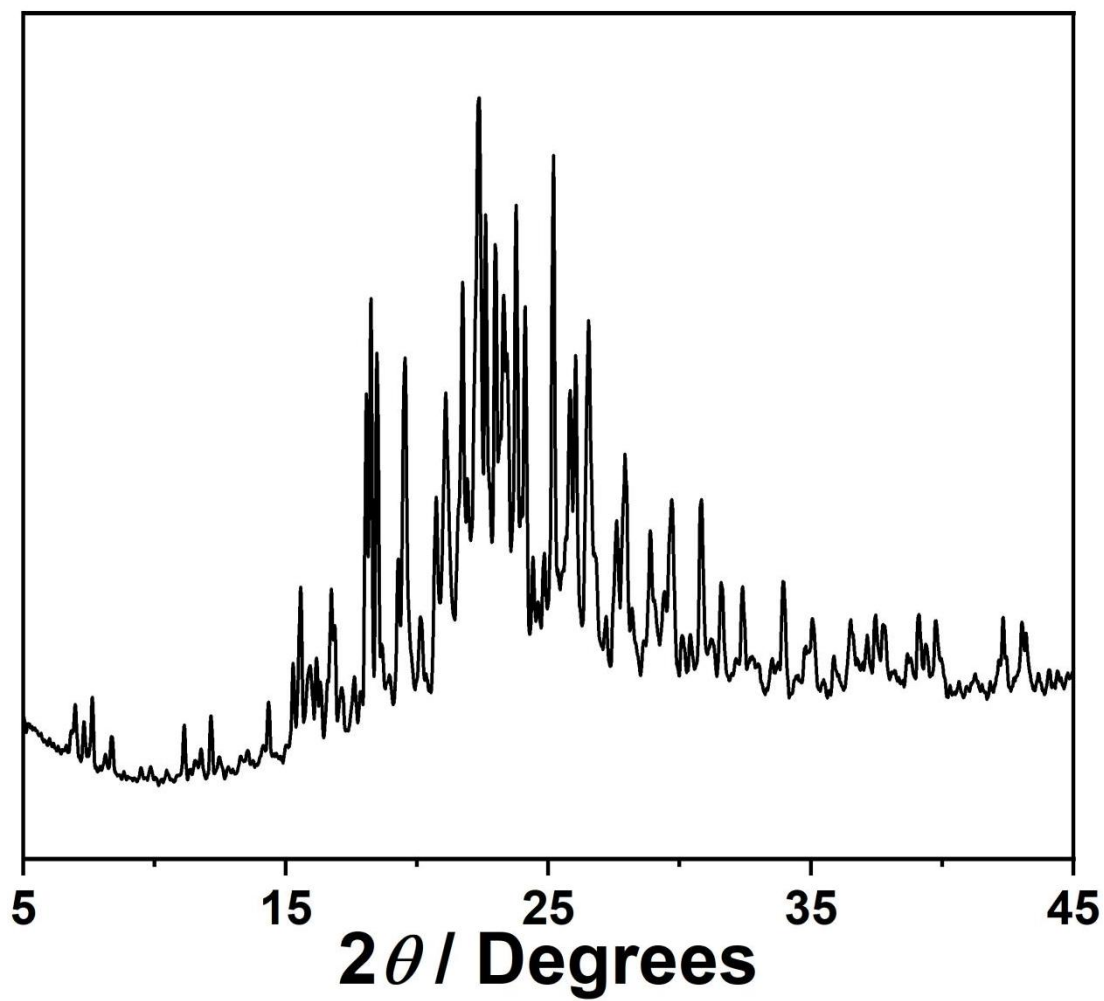

Fig. S5 Powder X-ray diffraction pattern of activated **BrP5** crystals.

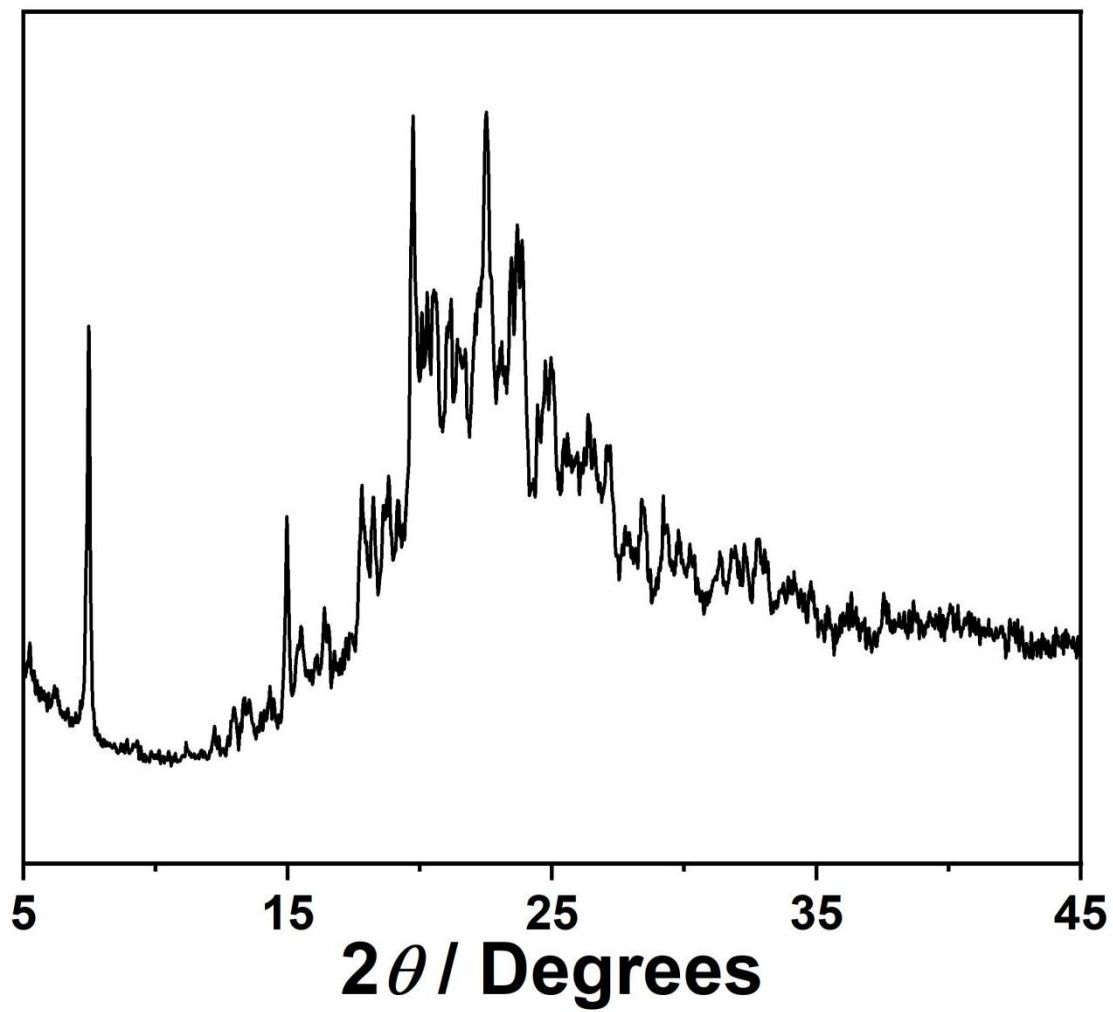

Fig. S6 Powder X-ray diffraction pattern of activated **BrP6** crystals.

## 5. Vapor-Phase Adsorption Measurements

### 5.1. Single-Component Monobromotoluene Isomers Adsorption Experiments

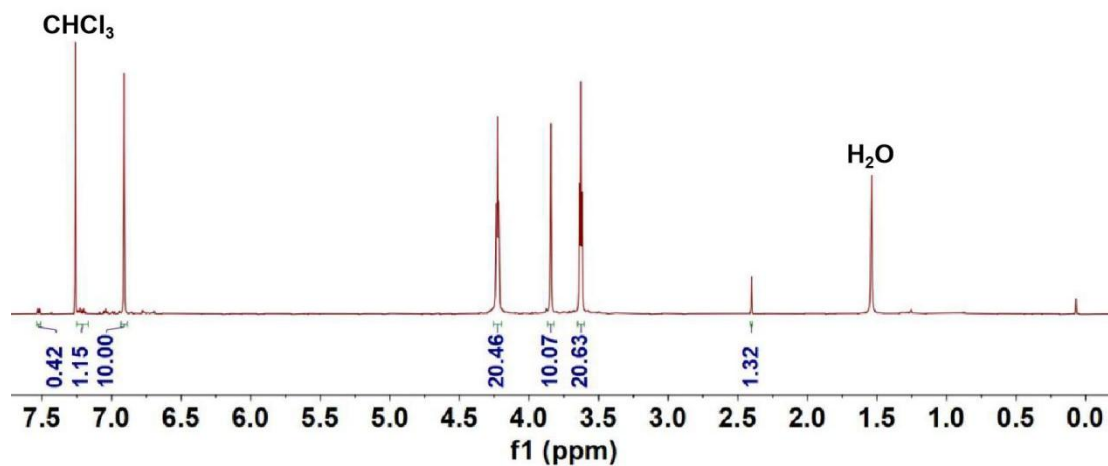

**Fig. S7** <sup>1</sup>H NMR spectrum (600 MHz, chloroform-*d*, 298 K) of activated **BrP5** crystals after adsorption of **OBt** vapor. The integration can be calculated as 0.44 equiv. of **OBt** per **BrP5** molecule.

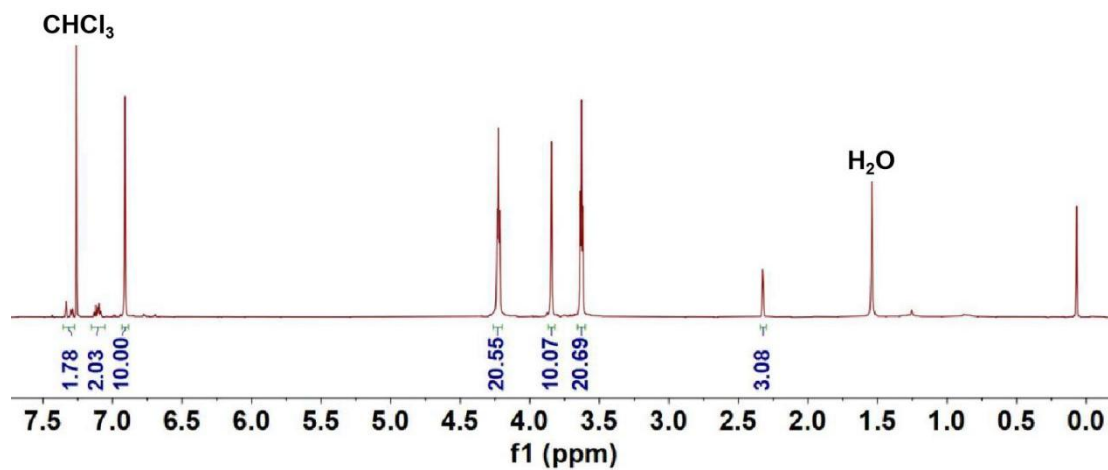

**Fig. S8** <sup>1</sup>H NMR spectrum (600 MHz, chloroform-*d*, 298 K) of activated **BrP5** crystals after adsorption of **MBT** vapor. The integration can be calculated as 1.03 equiv. of **MBT** per **BrP5** molecule.

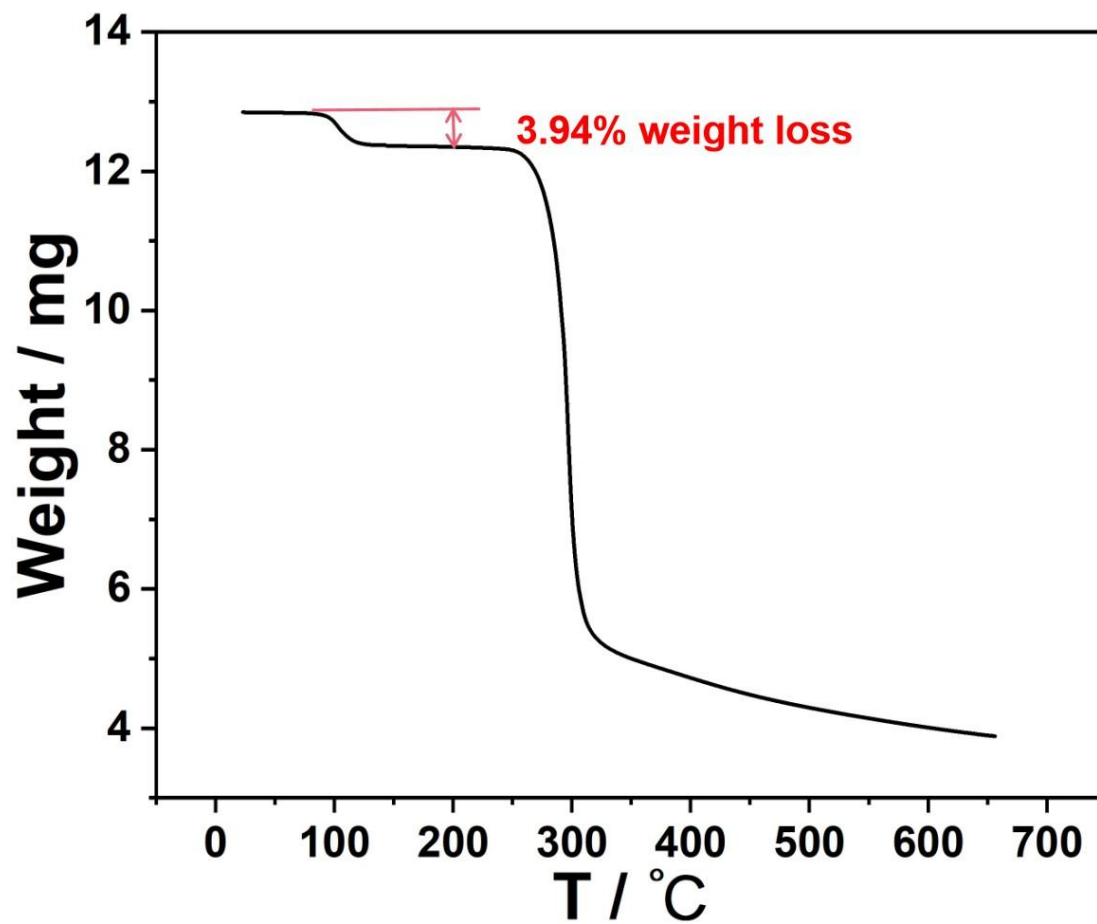

Fig. S9 Thermogravimetric analysis of activated **BrP5** crystals after adsorption of **OBT** vapor. The weight loss below 100 °C can be calculated as about 0.4 equiv. of **OBT** per **BrP5** molecule.

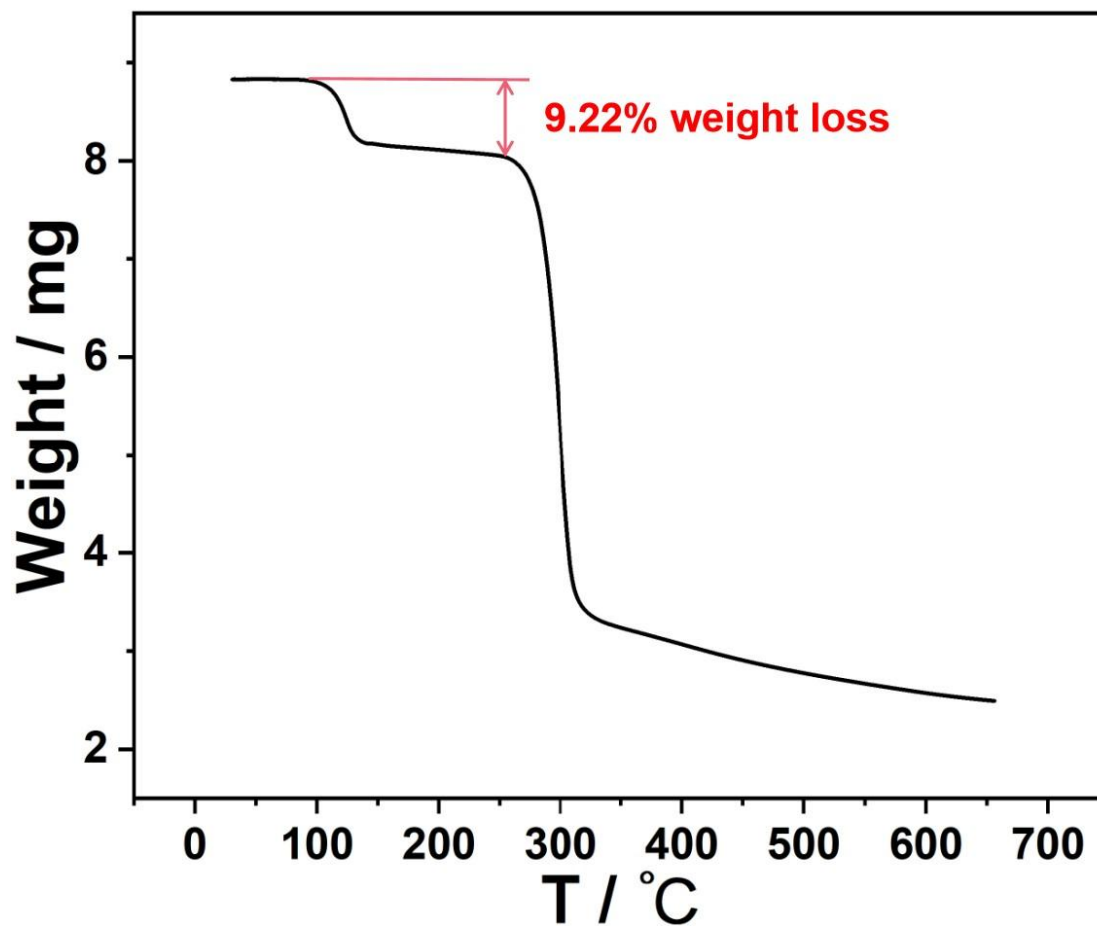

Fig. S10 Thermogravimetric analysis of activated **BrP5** crystals after adsorption of **MBT** vapor. The weight loss below 100 °C can be calculated as about 1.0 equiv. of **MBT** per **BrP5** molecule.

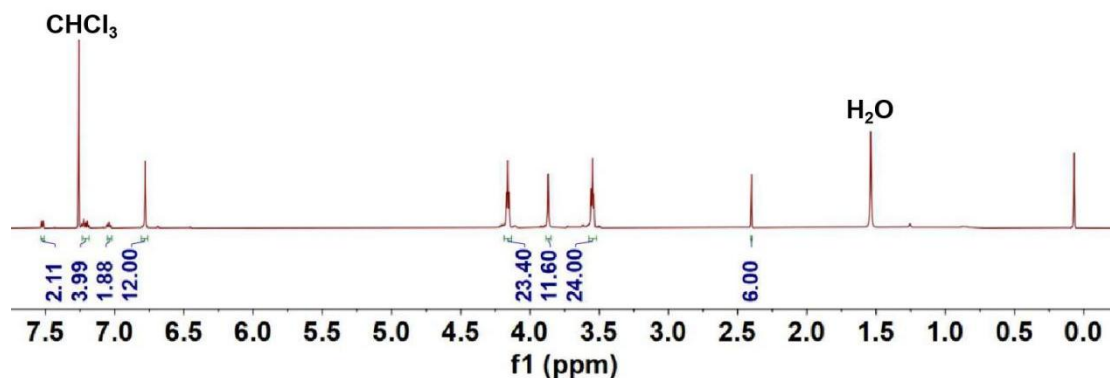

**Fig. S11** <sup>1</sup>H NMR spectrum (600 MHz, chloroform-*d*, 298 K) of activated **BrP6** crystals after adsorption of **OBT** vapor. The integration can be calculated as 2.00 equiv. of **OBT** per **BrP6** molecule.

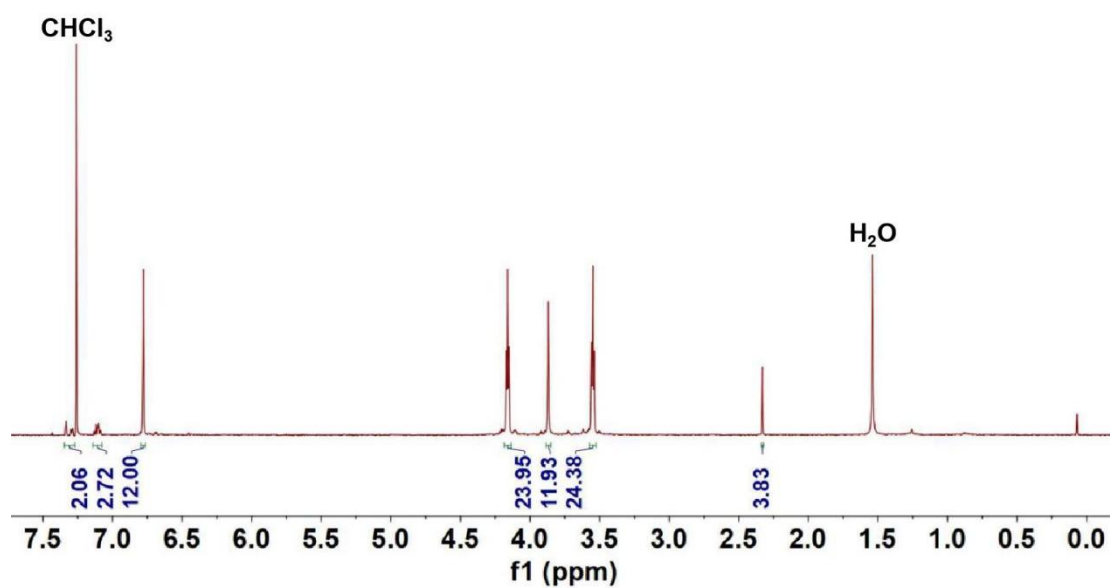

**Fig. S12** <sup>1</sup>H NMR spectrum (600 MHz, chloroform-*d*, 298 K) of activated **BrP6** crystals after adsorption of **MBT** vapor. The integration can be calculated as 1.28 equiv. of **MBT** per **BrP5** molecule.

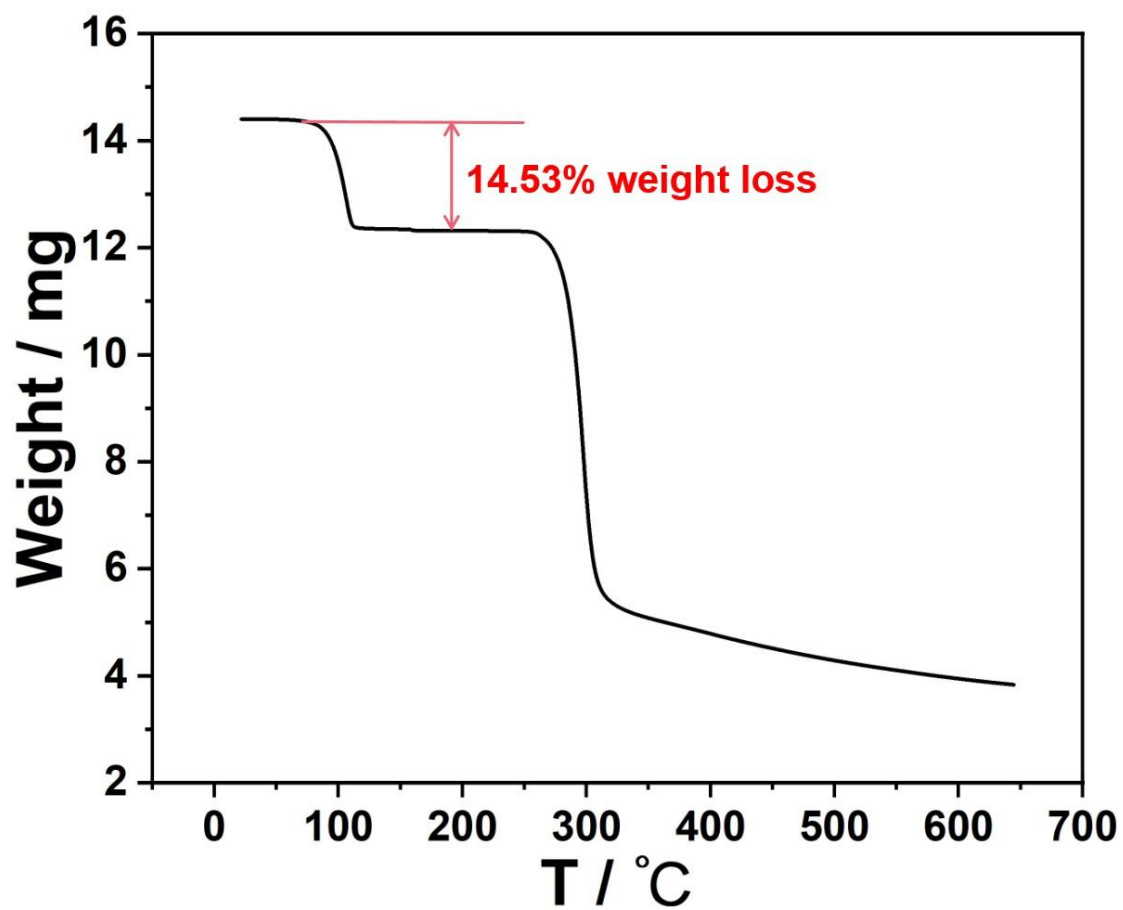

**Fig. S13** Thermogravimetric analysis of activated **BrP6** crystals after adsorption of **OBT** vapor. The weight loss below 100 °C can be calculated as about 2.0 equiv. of **OBT** per **BrP6** molecule.



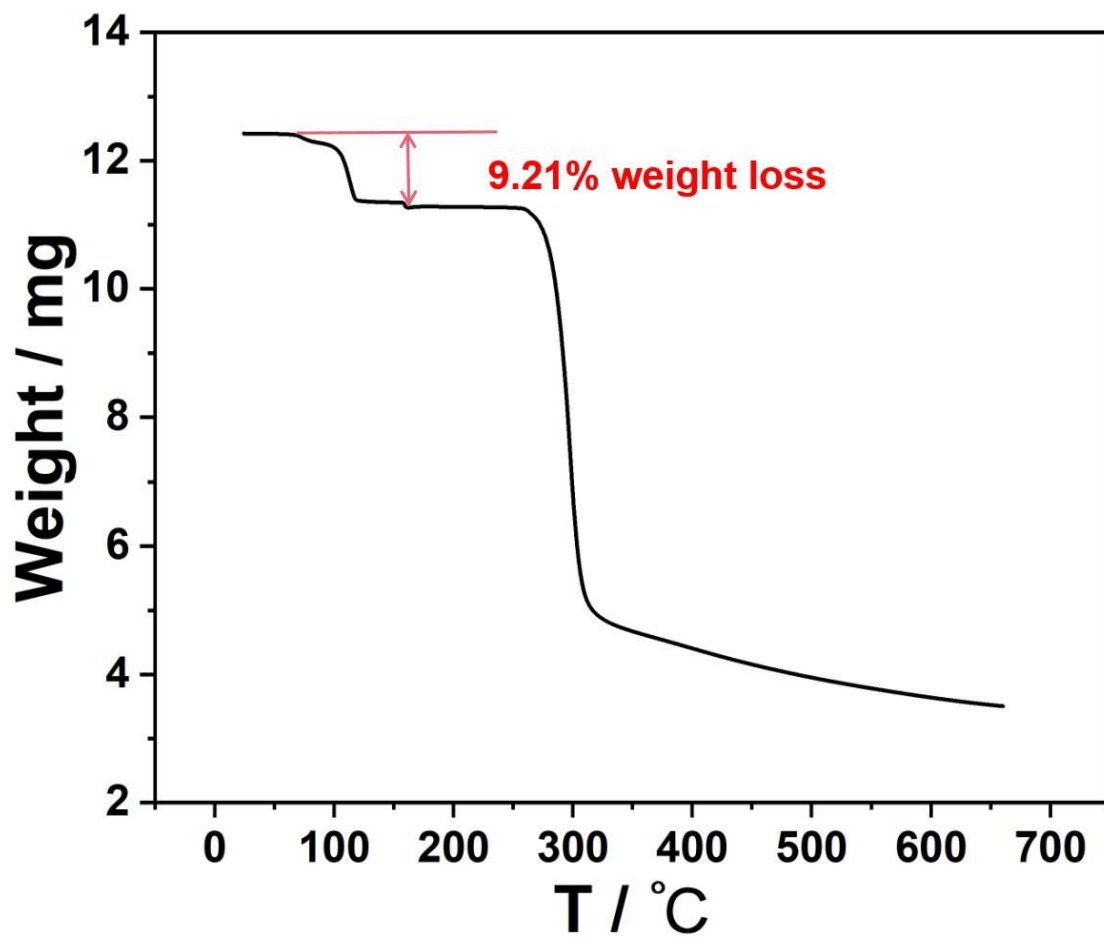

Fig. S14 Thermogravimetric analysis of activated **BrP6** crystals after adsorption of **MBT** vapor. The weight loss below 100 °C can be calculated as about 1.2 equiv. of **MBT** per **BrP5** molecule.

5.2. Structural Analyses

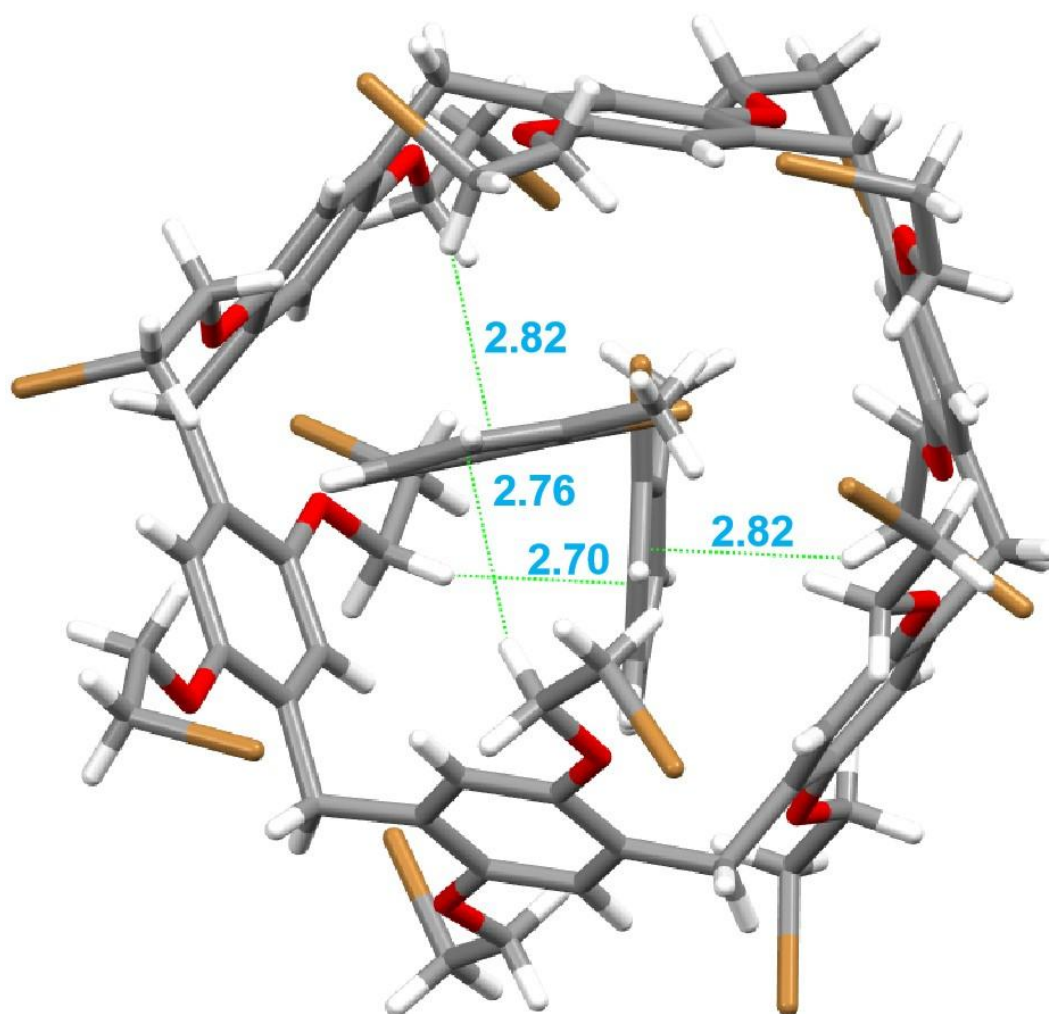

**Fig. S15** Single crystal structure of **(OBT)<sub>2</sub>@BrP6**. [C–H··· $\pi$ ] distances (Å): 2.70; 2.76; 2.82; 2.82.

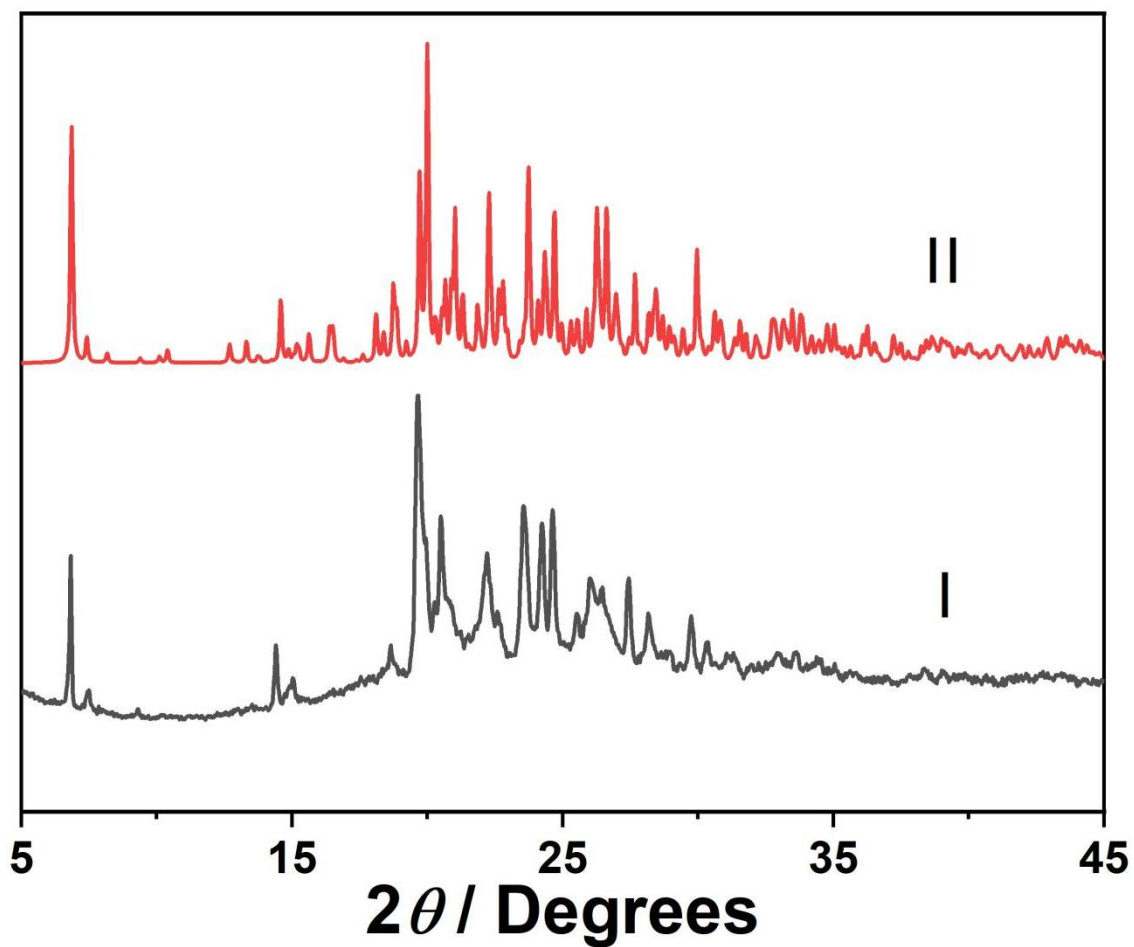

**Fig. S16** Powder X-ray diffraction patterns of **BrP6**: (I) after adsorption of **OBT** vapor; (II) simulated from single crystal structure of **(OBT)<sub>2</sub>@BrP6**.

Moreover, we investigated the integration ability of **BrP5** with **MBT** by Job plot and  $^1\text{H}$  NMR titration according to the previous report.<sup>S4</sup> The Job plot illustrated that the binding stoichiometry is 1:1 for **BrP5** and **MBT** in  $\text{CDCl}_3$  (Fig. S17).  $^1\text{H}$  NMR titration experiment demonstrated that the binding constant ( $K$ ) of **BrP5** and **MBT** was  $6.01 \pm 0.48 \text{ M}^{-1}$  (Fig. S18).

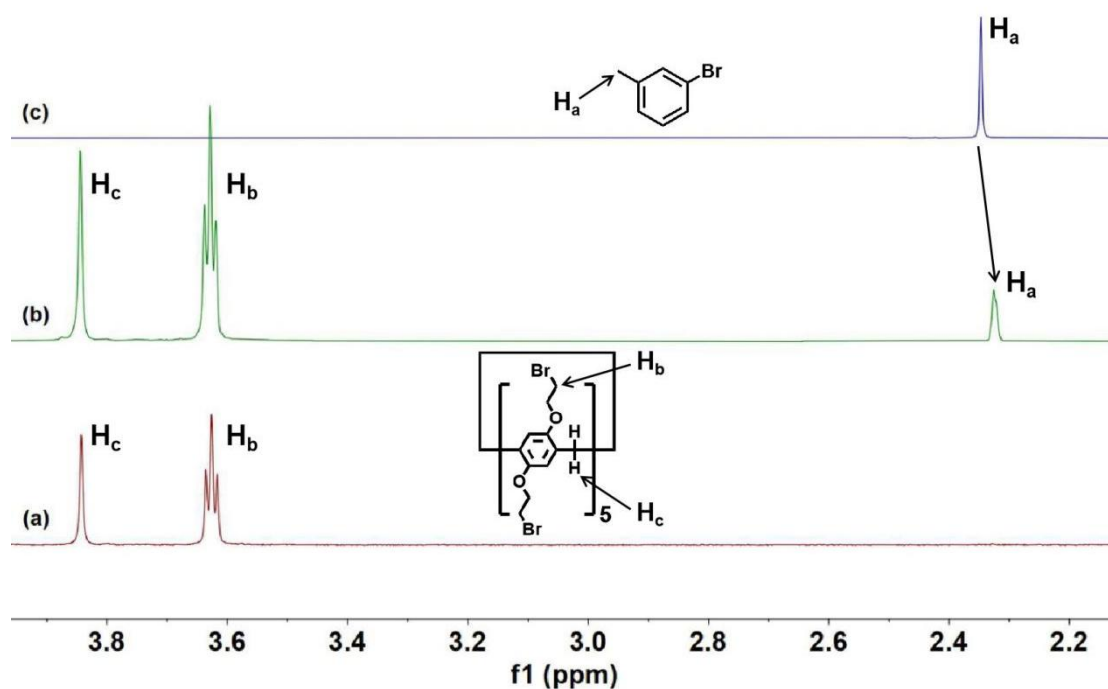

**Fig. S17**  $^1\text{H}$  NMR spectra (600 MHz, chloroform-*d*, 298 K): (a) **BrP5**; (b) **BrP5** after adsorbing **MBT**; (c) **MBT**. The peaks of **MBT** displayed upfield shifts in spectrum (b), indicating that **MBT** was located in the cavity of **BrP5** in solution.

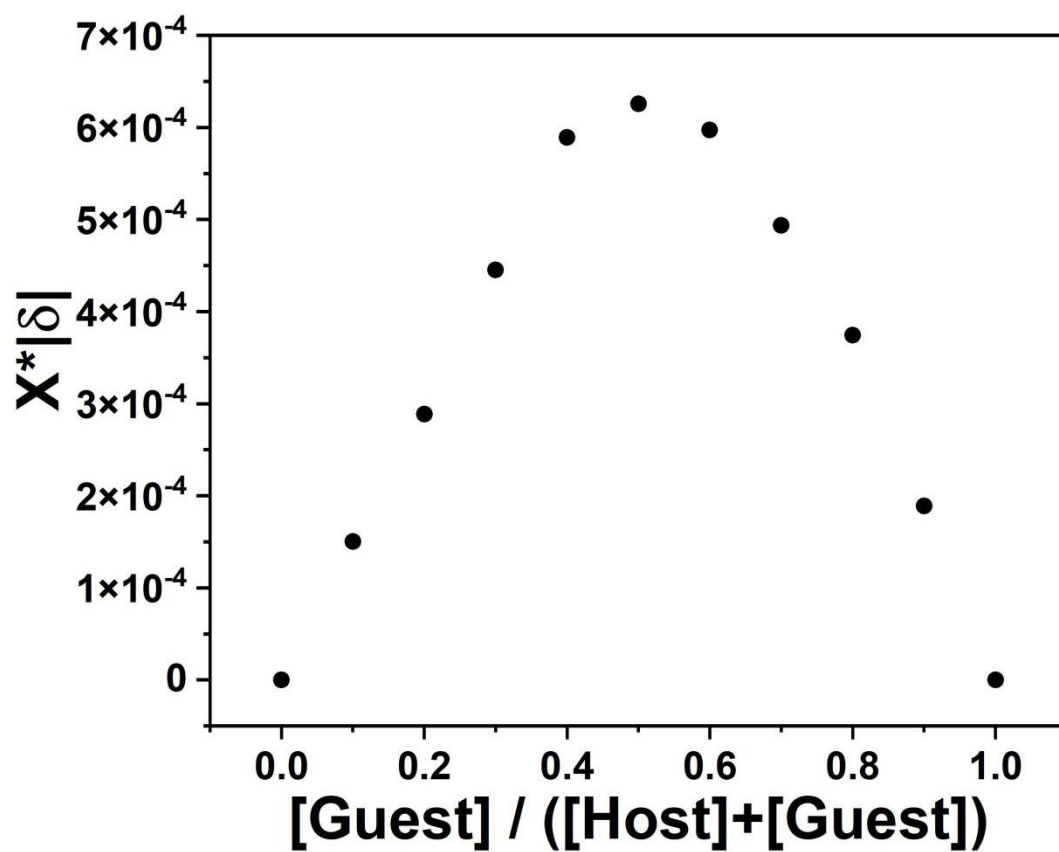

Fig. S18 Job plot showing the 1:1 stoichiometry of the complexation between BrP5 and MBT in CDCl<sub>3</sub>.

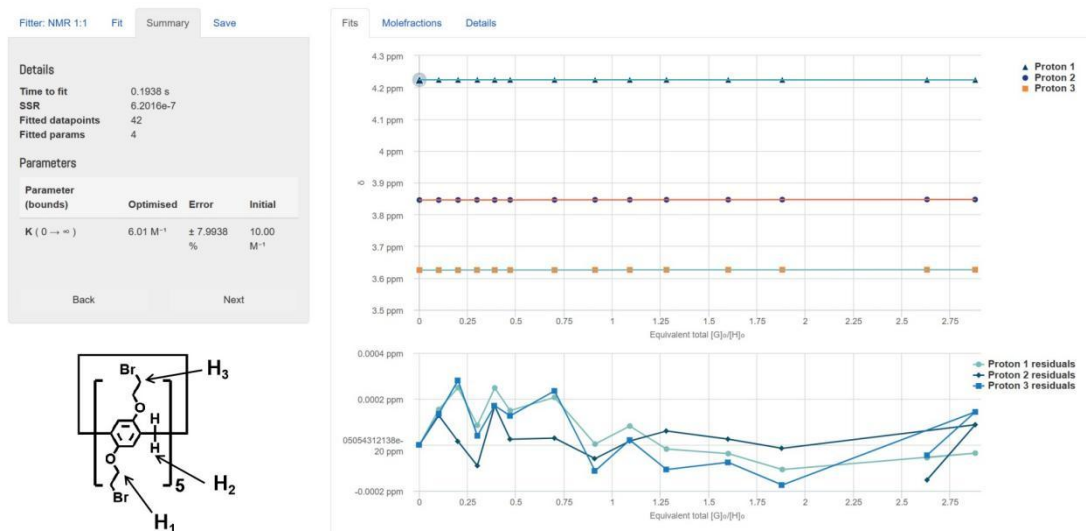

**Fig. S19** A plot of the resonance downfield shifts of H<sub>1</sub>, H<sub>2</sub> and H<sub>3</sub> of **BrP5** versus  $[\text{MBT}] / [\text{BrP5}]$ . The data were fitted to a 1:1 binding model to give  $K = 6.01 \pm 0.48 \text{ M}^{-1}$ . All solid lines were obtained from non-linear curve-fitting to a 1:1 binding model using the [www.supramolecular.org](http://www.supramolecular.org) web applet.

### 5.3. The adsorption behavior of **BrP6** to an equal volume **MBT** and **OBT** mixture

For each vapor-phase mixture experiment, an open 5.00 mL vial containing 20.00 mg of activated **BrP6** adsorbent was placed in a sealed 20.00 mL vial containing 1.00 mL of a 50:50 *v/v* **MBT** and **OBT** mixture. The relative uptake of **MBT** or **OBT** by activated **BrP6** was measured by heating the crystals to release the adsorbed vapor using gas chromatography. Before measurements, the crystals were heated at 60 °C for half an hour to remove the surface-physically adsorbed vapor.

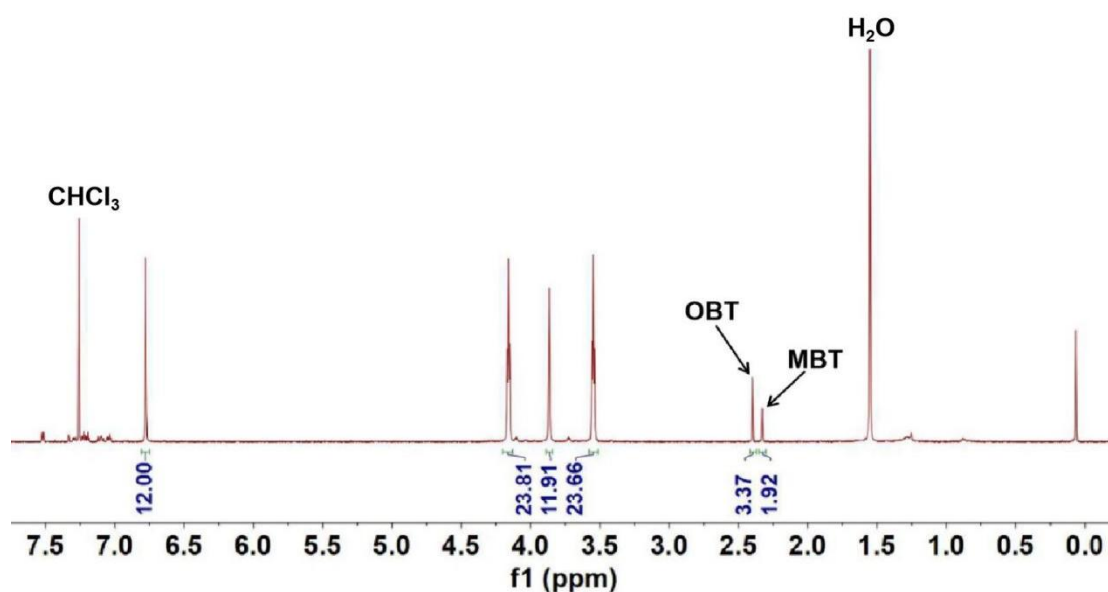

**Fig. S20** <sup>1</sup>H NMR spectrum (600 MHz, chloroform-*d*, 298 K) of activated **BrP6** crystals after adsorption of a 50:50 (*v/v*) **MBT** and **OBT** mixture vapor.

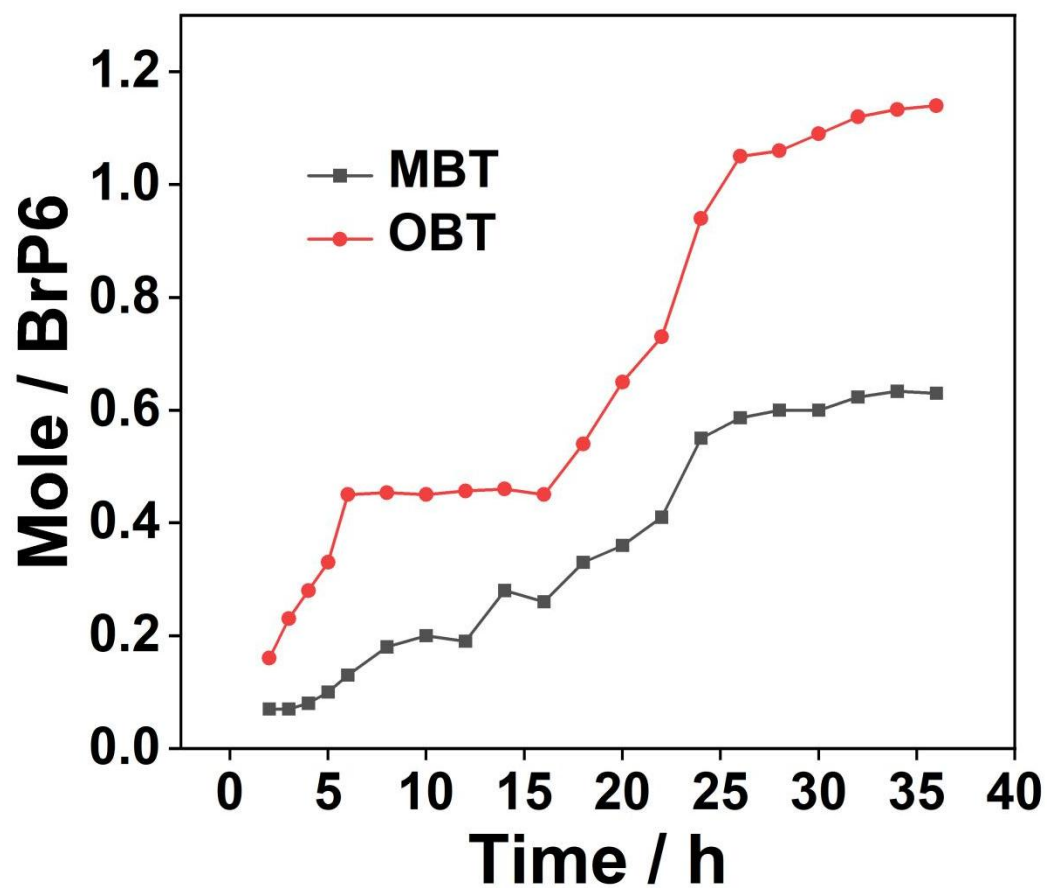

**Fig. S21** Time-dependent solid-vapor adsorption plots of **BrP6** for **MBT** and **OBT** (v:v = 50:50) mixed vapor at 303 K.



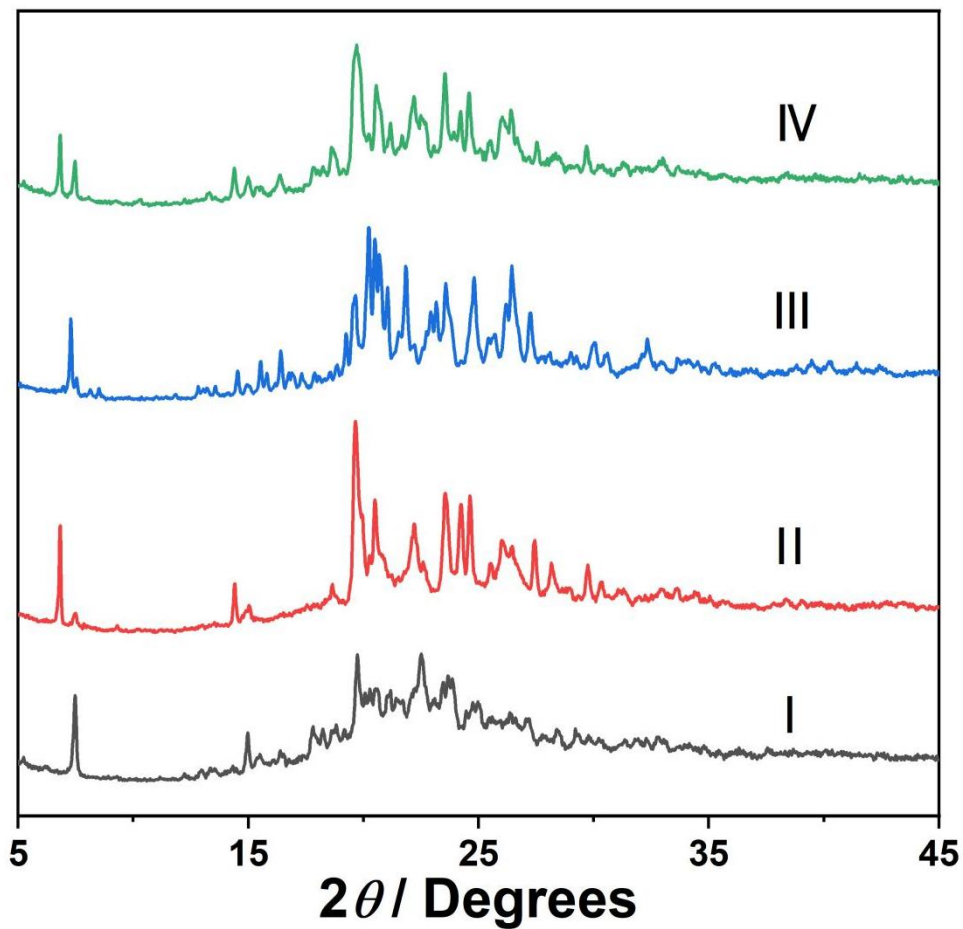

**Fig. S22** Powder X-ray diffraction patterns of **BrP6** crystals: (I) original activated **BrP6** crystals; (II) after adsorption of **OBT** vapor; (III) after adsorption of **MBT** vapor; (IV) after exposure to **MBT** and **OBT** equal volume mixture vapor. The pattern of (IV) resembled the superposition of (II) and (III).

#### 5.4. The adsorption behavior of **BrP5** to an equal volume **MBT** and **OBT** mixture

For each vapor-phase mixture experiment, an open 5.00 mL vial containing 20.00 mg of activated **BrP5** adsorbent was placed in a sealed 20.00 mL vial containing 1.00 mL of a 50:50 *v/v* **MBT** and **OBT** mixture. The relative uptake of **MBT** or **OBT** by activated **BrP5** was measured by heating the crystals to release the adsorbed vapor using gas chromatography. Before measurements, the crystals were heated at 60 °C for half an hour to remove the surface-physically adsorbed vapor.

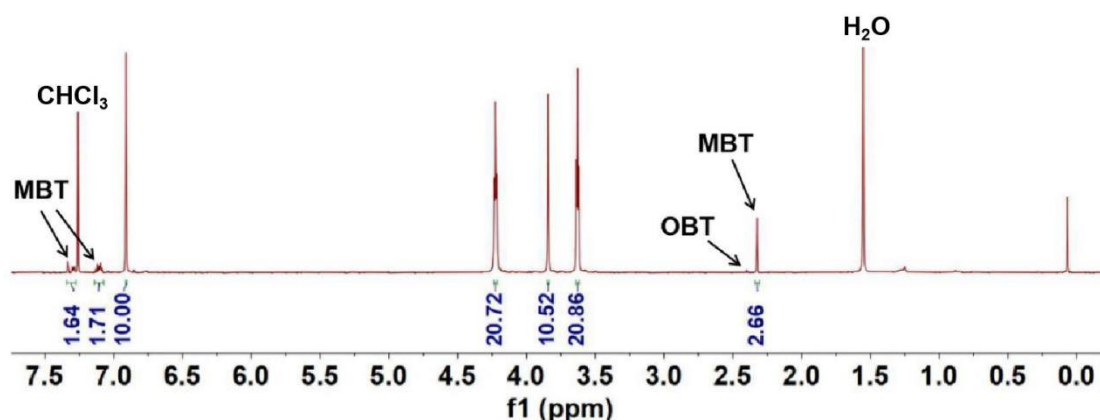

**Fig. S23** <sup>1</sup>H NMR spectrum (600 MHz, chloroform-*d*, 298 K) of activated **BrP5** crystals after adsorption of a 50:50 *v/v* **MBT** and **OBT** mixture vapor.

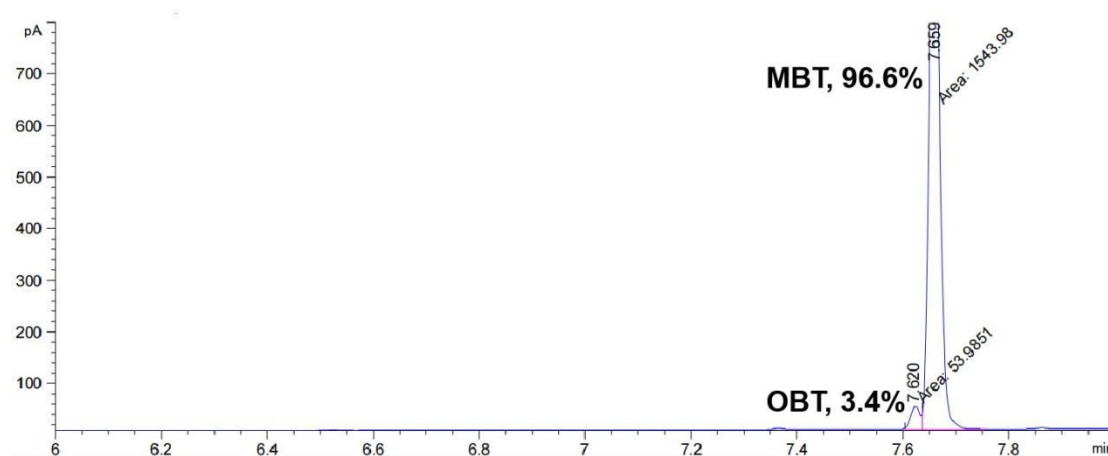

**Fig. S24** Relative uptake of the **MBT/OBT** mixture (*v:v* = 50:50) adsorbed in activated **BrP5** crystals after 40 hours.

### 5.5. The adsorption behavior of **BrP5** to different volume **MBT** and **OBT** mixtures

For each vapor-phase mixture experiment, an open 5.00 mL vial containing 20.00 mg of activated **BrP5** adsorbent was placed in a sealed 20.00 mL vial containing 1.00 mL of different volume **MBT** and **OBT** mixtures. The volume ratios of **MBT** and **OBT** were 20:80, 40:60, 60:40, 80:20, respectively. The relative uptake of **MBT** or **OBT** by activated **BrP5** was measured by heating the crystals to release the adsorbed vapor using gas chromatography. Before measurements, the crystals were heated at 60 °C for half an hour to remove the surface-physically adsorbed vapor.

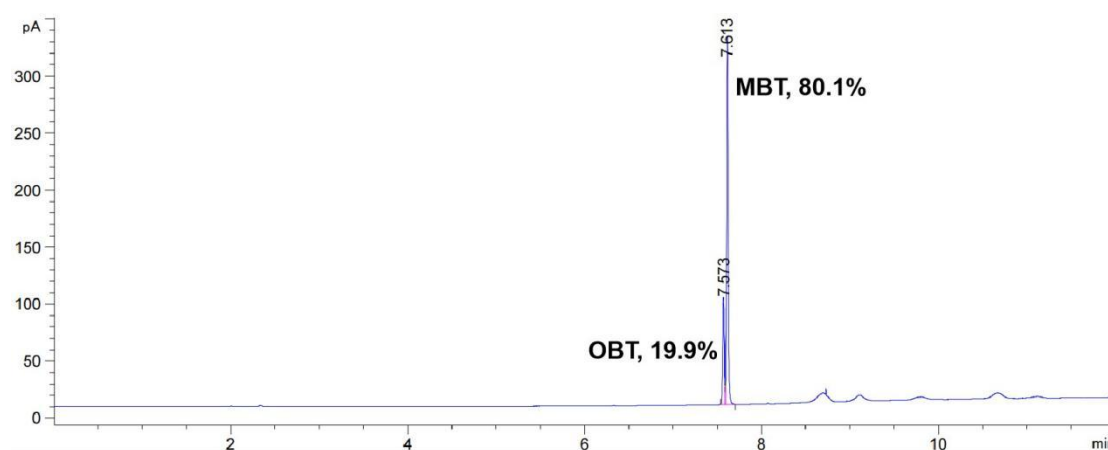

**Fig. S25** Relative uptake of the **MBT/OBT** mixture (v:v = 20:80) adsorbed in activated **BrP5** crystals after 40 hours.

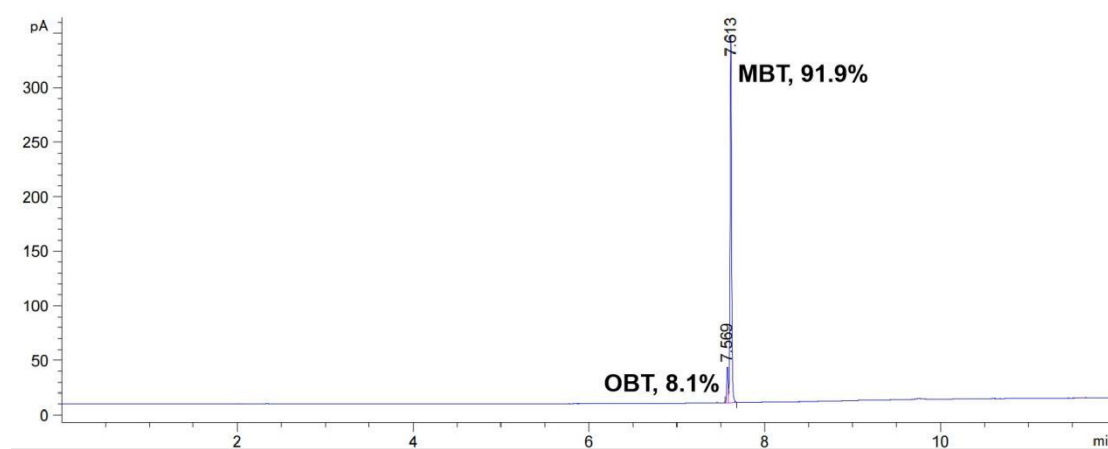

**Fig. S26** Relative uptake of the **MBT/OBT** mixture (v:v = 40:60) adsorbed in activated **BrP5** crystals after 40 hours.

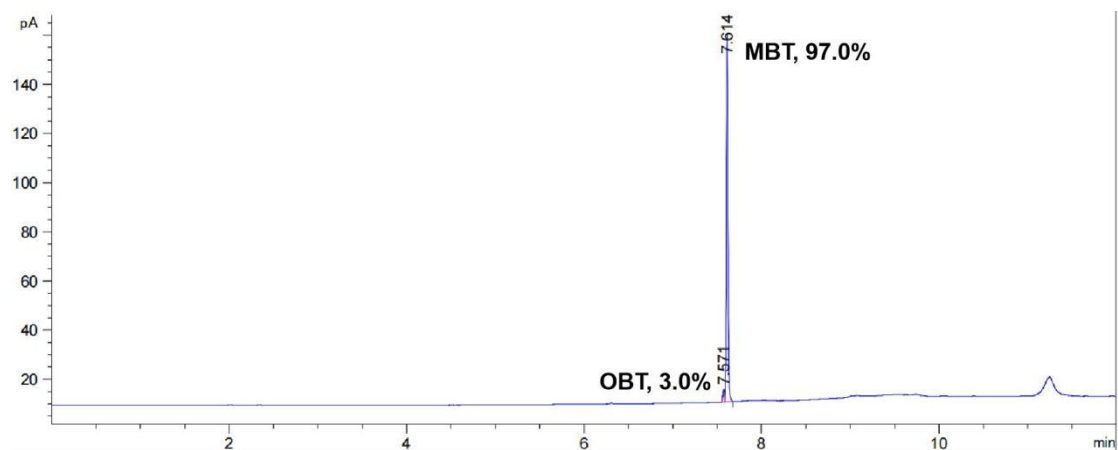

**Fig. S27** Relative uptake of the MBT/OBT mixture (v:v = 60:40) adsorbed in activated BrP5 crystals after 40 hours.

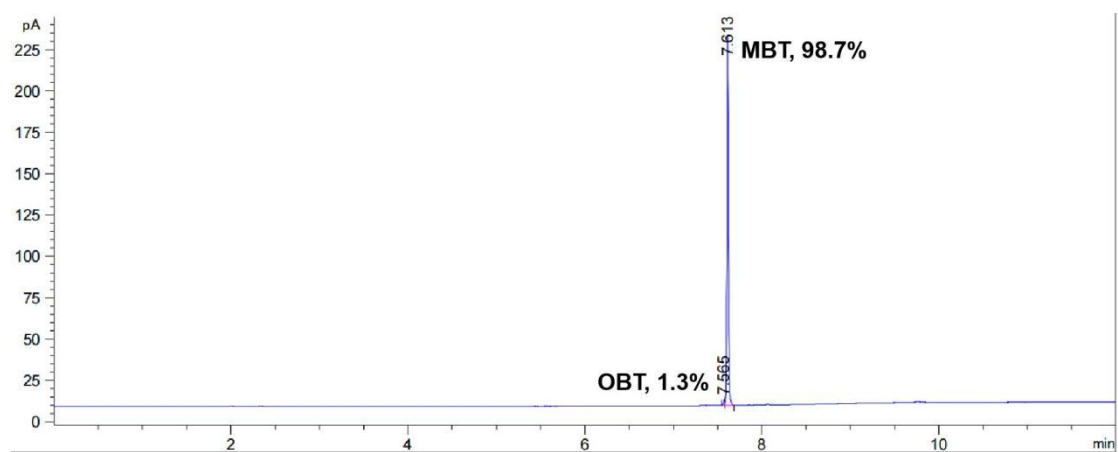

**Fig. S28** Relative uptake of the MBT/OBT mixture (v:v = 80:20) adsorbed in activated BrP5 crystals after 40 hours.

## 6. Recyclability Test

### Recyclability of Activated **BrP5** Crystals

An open 5.00 mL vial containing 20.00 mg of **BrP5** after adsorption was desolvated under vacuum at 100 °C overnight. The resultant crystals were characterized by PXRD and <sup>1</sup>H NMR.

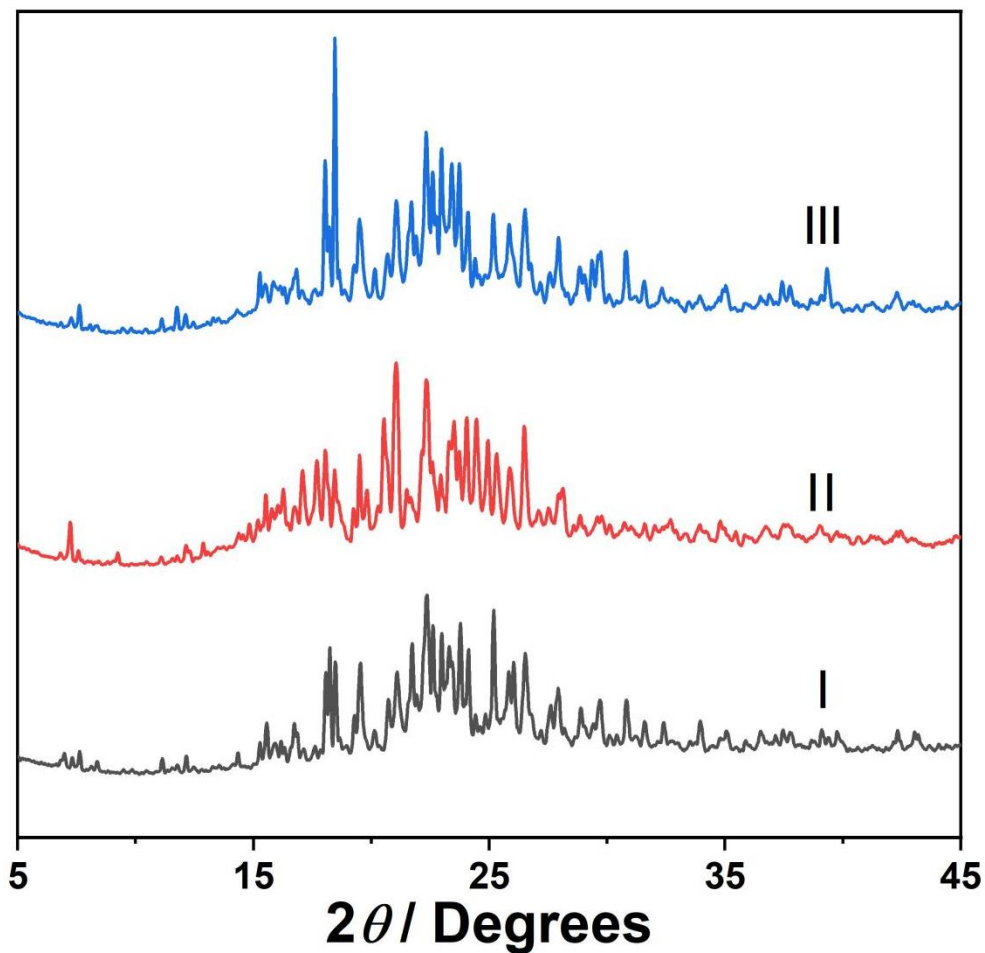

**Fig. S29** Powder X-ray diffraction patterns of **BrP5** crystals: (I) original activated **BrP5** crystals; (II) **BrP5** crystals after exposure to **MBT** and **OBT** equal volume mixture vapor; (III) desolvated **BrP5** crystals.

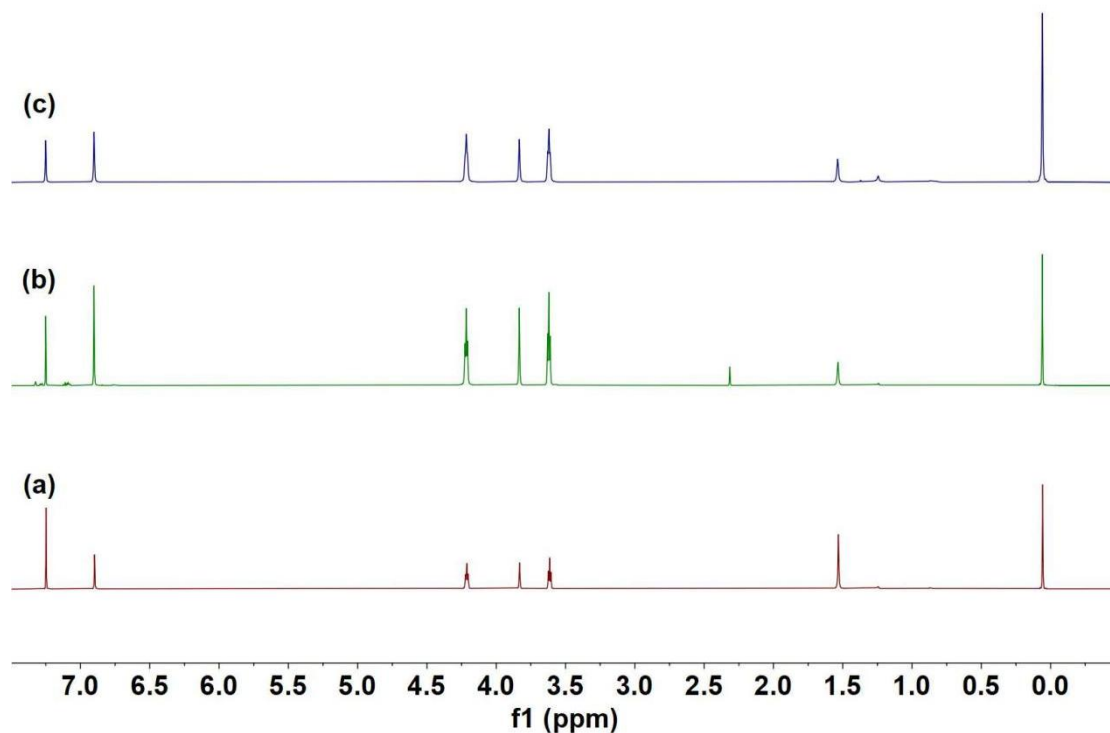

**Fig. S30**  $^1\text{H}$  NMR spectra (600 MHz, chloroform-*d*, 298 K): (a) original activated **BrP5** crystals; (b) **BrP5** crystals after exposure to **MBT** and **OBT** equal volume mixture vapor; (c) desolvated **BrP5** crystals.

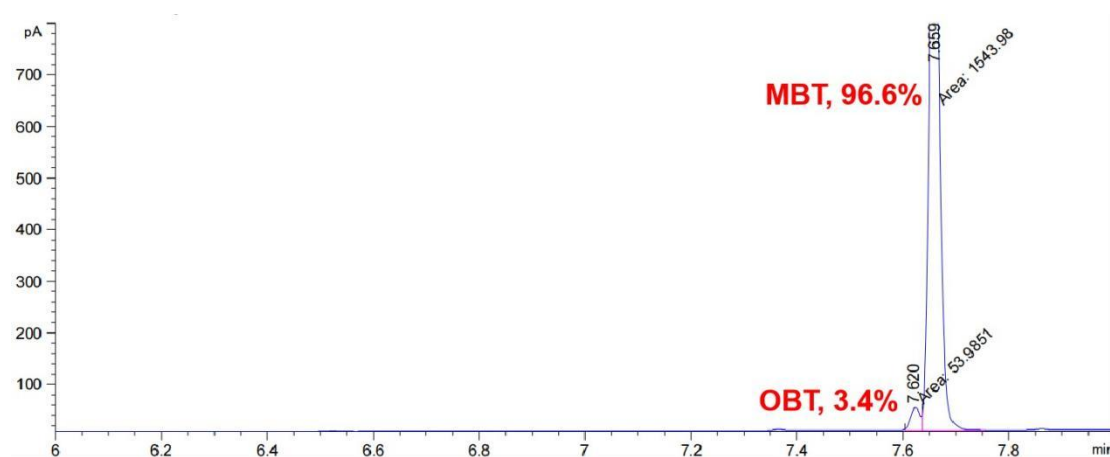

**Fig. S31** The first cycle of adsorption of the equal volume mixture of **MBT** and **OBT** by **BrP5** crystals measured by GC.

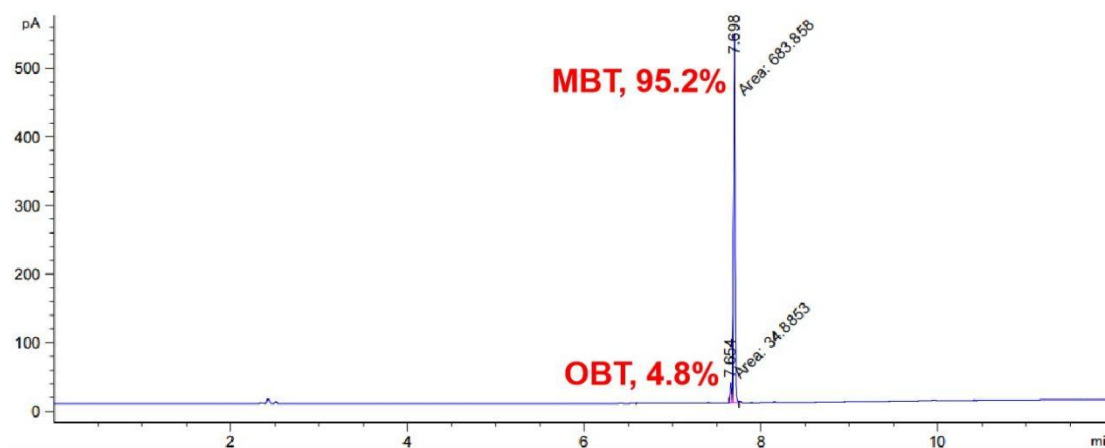

**Fig. S32** The second cycle of adsorption of the equal volume mixture of **MBT** and **OBT** by **BrP5** crystals measured by GC.

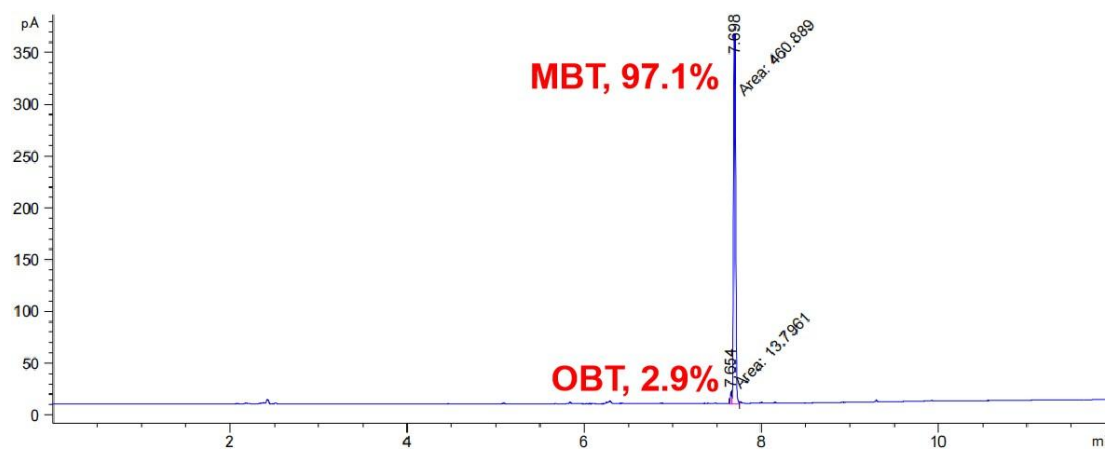

**Fig. S33** The third cycle of adsorption of the equal volume mixture of **MBT** and **OBT** by **BrP5** crystals measured by GC.

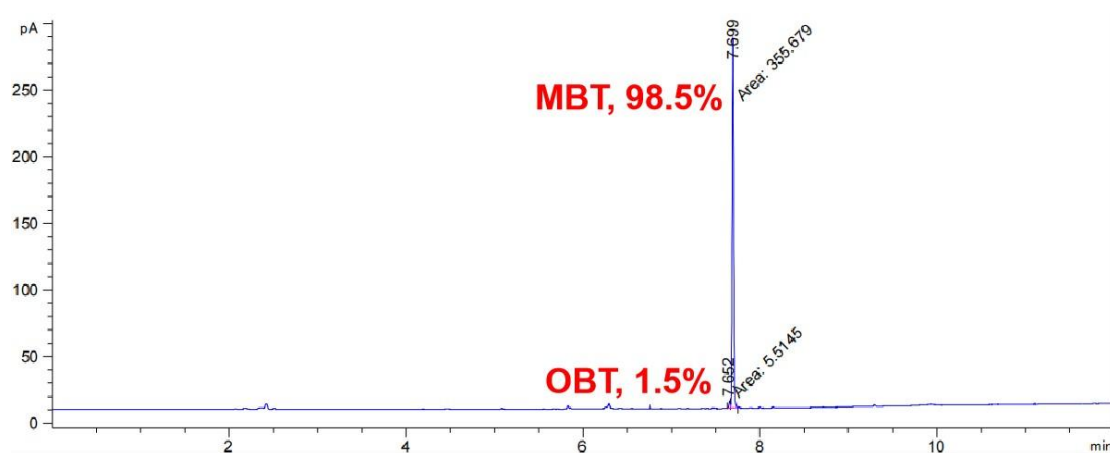

**Fig. S34** The fourth cycle of adsorption of the equal volume mixture of MBT and OBT by BrP5 crystals measured by GC.

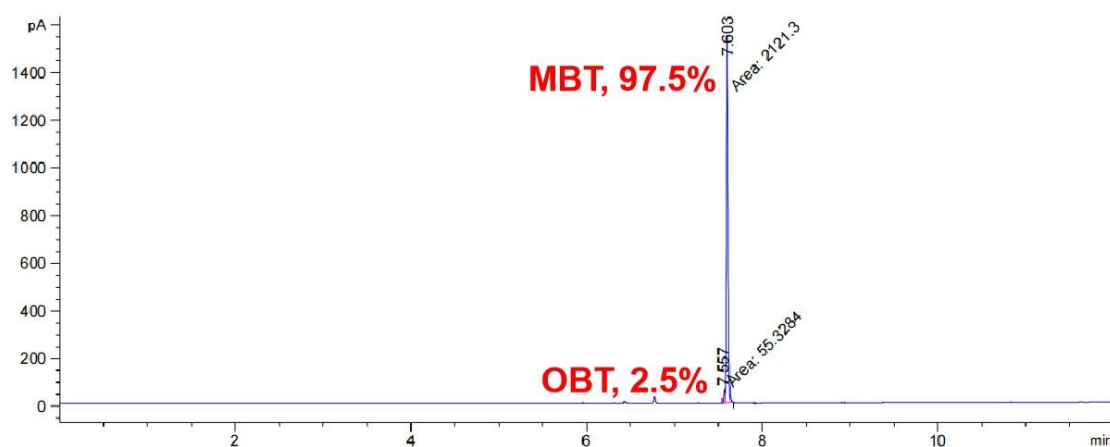

**Fig. S35** The fifth cycle of adsorption of the equal volume mixture of MBT and OBT by BrP5 crystals measured by GC.



## 7. References

S1 Y. Yao, M. Xue, X. Chi, Y. Ma, J. He, Z. Abliz and F. Huang, *Chem. Commun.*, 2012, **48**, 6505–6507.

S2 Y. Yao, J. Li, J. Dai, X. Chi and M. Xue, *RSC Adv.*, 2014, **4**, 9039–9043.

S3 E. Li, Y. Zhou, R. Zhao, K. Jie and F. Huang, *Angew. Chem. Int. Ed.*, 2019, **58**, 3981–3985.

S4 S. Fang, E. Li, D. Zhu, G. Wu, Q. Zhang, C. Lin, F. Huang and H. Li, *Chem. Commun.*, 2021, **57**, 6074–6077.
